# Supplementary material for: Beauveria bassiana Xylanase: Characterization and Wastepaper Deinking Potential of a Novel Glycosyl Hydrolase from an Endophytic Fungal Entomopathogen
Source: MDPI journal article supplement (doi:10.3390/jof7080668), 2021-08-18
Supplement: s1 [file s1]

# ***Beauveria bassiana* xylanase: characterization and wastepaper deinking potential of a novel xylanolytic enzyme from an endophytic fungal entomopathogen**

Ayodeji Amobonye<sup>a</sup>, Prashant Bhagwat<sup>a</sup>, Suren Singh<sup>a</sup>, Santhosh Pillai<sup>a\*</sup>

<sup>a</sup>Department of Biotechnology and Food Science, Faculty of Applied Sciences, Durban University of Technology, P O Box 1334, Durban, KwaZulu-Natal, 4000, South Africa.

\*Corresponding author. E-mail: santhoshk@dut.ac.za

Amobonye Ayodeji: <https://orcid.org/0000-0002-3220-5858>

Prashant Bhagwat: <https://orcid.org/0000-0001-5790-7824>

Suren Singh: <https://orcid.org/0000-0003-1064-6297>

Santhosh Pillai : <https://orcid.org/0000-0003-3474-1555>

**Table S1:** ANOVA of quadratic models for xylanase-assisted printed paper deinking

| Source                   | Sum of Squares | df | Mean Square | F-value | p-value  |
|--------------------------|----------------|----|-------------|---------|----------|
| <b>Model</b>             | 4823.68        | 9  | 535.96      | 123.02  | < 0.0001 |
| A-Incubation temperature | 32.16          | 1  | 32.16       | 7.38    | 0.0419   |
| B-Time                   | 381.43         | 1  | 381.43      | 87.55   | 0.0002   |
| C-Enzyme load            | 1299.99        | 1  | 1299.99     | 298.39  | < 0.0001 |
| AB                       | 0.1376         | 1  | 0.1376      | 0.0316  | 0.8659   |
| AC                       | 121.99         | 1  | 121.99      | 28.00   | 0.0032   |
| BC                       | 144.69         | 1  | 144.69      | 33.21   | 0.0022   |
| A <sup>2</sup>           | 285.84         | 1  | 285.84      | 65.61   | 0.0005   |
| B <sup>2</sup>           | 129.81         | 1  | 129.81      | 29.80   | 0.0028   |
| C <sup>2</sup>           | 1.86           | 1  | 1.86        | 0.4258  | 0.5429   |
| <b>Residual</b>          | 21.78          | 5  | 4.36        |         |          |
| Lack of Fit              | 0.2758         | 1  | 0.2758      | 0.0513  | 0.8319   |

$R^2 = 0.9955$ , Adjusted  $R^2 = 0.9874$ , Predicted  $R^2 = 0.9872$ , Adequate precision AP= 42.089. df; degree of freedom. \*Significant p- values at  $P \leq 0.1$
